# Supplementary material for: Organoselenium compounds: development of a universal “living” free radical polymerization mediator
Source: Royal Society of Chemistry journal article supplement (doi:10.1039/c3py00285c), 2013-01-01
Supplement: c3py00285c.pdf [file c3py00285c.pdf]

## Supporting Information

# Organoselenium Compounds: Development of a Universal “Living” Free Radical Polymerization Mediator

Jindong Zeng, Jian Zhu\*, Xiangqing Pan, Zhengbiao Zhang, Nianchen Zhou, Zhenping Cheng, Wei  
5 Zhang, and Xiulin Zhu\*

Jiangsu Key Laboratory of Advanced Functional Polymer Design and Application, Department of  
Polymer Science and Engineering, College of Chemistry, Chemical Engineering and Materials Science,  
Soochow University, Suzhou 215123, China.

### 10 **Synthesis of organoselenium compounds.**

**Procedures for the synthesis of cyanomethyl diethylcarbamodiselenoate (N1).**<sup>[1]</sup> Diethylamine  
(0.22 g, 6 mmol) was dissolved in THF (10 mL), and a solution of CSe<sub>2</sub> (0.53 g, 3 mmol) and THF (2  
mL) was added at 0 °C over 3 min. Then, a solution of BrCH<sub>2</sub>CN (0.36 g, 3 mmol) and THF (2 mL)  
was added at 0 °C over 3 min. After stirring for 15 min, the mixture was extracted with CH<sub>2</sub>Cl<sub>2</sub> and  
15 washed with water. The organic phase was dried over anhydrous Na<sub>2</sub>SO<sub>4</sub>, filtered, and evaporated  
under vacuum. The residue was subjected to column chromatography on silica eluting with ethyl  
acetate/n-hexane (1:5) to afford the product in 85% yield. <sup>1</sup>H NMR (CDCl<sub>3</sub>, δ, ppm): 1.34 (t, 3H,

CH<sub>3</sub>), 1.36 (t, 3H, CH<sub>3</sub>), 3.72 (m, 2H, CH<sub>2</sub>), 4.15 (m, 2H, CH<sub>2</sub>), 4.19 (s, 2H, CH<sub>2</sub>CN); <sup>13</sup>C NMR (CDCl<sub>3</sub>, δ, ppm): 11.88, 20.62, 12.82, 51.07, 54.97, 117.70, 189.66; LCMS (ESI) m/z: [M + H]<sup>+</sup> calcd. for C<sub>7</sub>H<sub>12</sub>N<sub>2</sub>Se<sub>2</sub>, 284.93 (100%), 282.93 (82.1%), 280.94 (33.9%); found: 284.9385, 282.9398, 280.9405; HPLC: 98.6%.

5 **Procedure for the synthesis of Se-cyanomethyl O-ethyl carbonodiselenoate (O1).** Ethanol (3 mL) was stirred with NaOH (0.12 g, 3 mmol) at 0 °C. A solution of CSe<sub>2</sub> (0.53 g, 3 mmol) and THF (2 mL) was added at 0 °C over 3 min. Then, a solution of BrCH<sub>2</sub>CN (0.36 g, 3 mmol) and THF (2 mL) was added at 0 °C over 3 min. After stirring for 15 min, the mixture was extracted with CH<sub>2</sub>Cl<sub>2</sub> and washed with water. The organic phase was dried over anhydrous Na<sub>2</sub>SO<sub>4</sub>, filtered, and evaporated under  
10 vacuum. The residue was subjected to column chromatography on silica eluting with ethyl acetate/hexane (1:10) to afford the product in 78% yield. <sup>1</sup>H NMR (CDCl<sub>3</sub>, δ, ppm): 1.58 (t, 3H, CH<sub>3</sub>), 3.75 (s, 2H, CH<sub>2</sub>CN), 4.87 (m, 2H, CH<sub>2</sub>CH<sub>3</sub>); <sup>13</sup>C NMR (CDCl<sub>3</sub>, δ, ppm): 8.46, 8.72, 70.69, 111.12, 208.71; LCMS (ESI) m/z: [M + Na]<sup>+</sup> calcd. for C<sub>5</sub>H<sub>7</sub>NOSe<sub>2</sub>, 279.89 (100%), 277.89 (88.9%), 275.89 (53.0%); found: 279.8775, 277.8786, 275.8793; HPLC: 99.7%.

15 **Procedure for the synthesis of Se-cyanomethyl O-phenyl carbonodiselenoate (O2).** Phenol (0.30 g, 3 mmol) was dissolved in THF (10 mL) and stirred with NaOH (0.12 g, 3 mmol) at 0 °C. A solution of CSe<sub>2</sub> (0.53 g, 3 mmol) and THF (2 mL) was added at 0 °C over 3 min. Then, a solution of BrCH<sub>2</sub>CN (0.36 g, 3 mmol) and THF (2 mL) was added at 0 °C over 3 min. After stirring for 15 min, the mixture was extracted with CH<sub>2</sub>Cl<sub>2</sub> and washed with water. The organic phase was dried over anhydrous  
20 Na<sub>2</sub>SO<sub>4</sub>, filtered, and evaporated under vacuum. The residue was subjected to column chromatography on silica eluting with ethyl acetate/hexane (1:10) to afford the product in 65% yield. <sup>1</sup>H NMR (CDCl<sub>3</sub>, δ, ppm): 3.88 (s, 2H, CH<sub>2</sub>), 7.20-7.50 (m, 5H, C<sub>6</sub>H<sub>5</sub>); <sup>13</sup>C NMR (CDCl<sub>3</sub>, δ, ppm): 15.76, 116.29, 121.92, 127.64, 127.73 130.20, 166.70, 214.27; LCMS (ESI) m/z: [M + H]<sup>+</sup> calcd. for C<sub>9</sub>H<sub>7</sub>NOSe<sub>2</sub>, 305.89 (100%), 303.89 (89.6%) 301.89 (53.3%); found: 305.8931, 303.8935, 301.8951; HPLC: 98.5%.

**Procedure for the synthesis of ethyl 2-(phenoxycarbonoselenoylselanyl)acetate (O3).** Phenol (0.3 g, 3 mmol) was dissolved in THF (10 mL) and stirred with NaOH (0.12 g, 3 mmol) at 0 °C. A solution of CSe<sub>2</sub> (0.53 g, 3 mmol) and THF (2 mL) was added at 0 °C over 3 min. Then, a solution of BrCH<sub>2</sub>COOC<sub>2</sub>H<sub>5</sub> (0.36 g, 3 mmol) and THF (2 mL) was added at 0 °C over 3 min. After stirring for 15 min, the mixture was extracted with CH<sub>2</sub>Cl<sub>2</sub> and washed with water. The organic phase was dried over anhydrous Na<sub>2</sub>SO<sub>4</sub>, filtered, and evaporated under vacuum. The residue was subjected to column chromatography on silica eluting with ethyl acetate/hexane (1:10) to afford the product in 60% yield. <sup>1</sup>H NMR (CDCl<sub>3</sub>, δ, ppm): 1.29 (t, 3H, CH<sub>3</sub>), 4.05 (s, 2H, SeCH<sub>2</sub>), 4.23 (m, 2H, CH<sub>2</sub>C), 7.15-7.45 (m, 5H, C<sub>6</sub>H<sub>5</sub>); <sup>13</sup>C NMR (CDCl<sub>3</sub>, δ, ppm): 11.93, 32.80, 59.63, 119.59, 124.69, 127.42, 154.27, 163.26, 215.48; LCMS (ESI) m/z: [M + Na]<sup>+</sup> calcd. for C<sub>11</sub>H<sub>12</sub>O<sub>3</sub>Se<sub>2</sub>, 374.91 (100%), 372.91 (87.7%), 370.91 (52.0%); found: 374.9018, 372.9022, 370.9031; HPLC: 98.2%.

**Procedure for the synthesis of methyl 2-(phenoxycarbonoselenoylselanyl)-2-phenylacetate (O4).** Phenol (0.3 g, 3 mmol) was dissolved in THF (10 mL) and stirred with NaOH (0.12 g, 3 mmol) at 0 °C. A solution of CSe<sub>2</sub> (0.53 g, 3 mmol) and THF (2 mL) was added at 0 °C over 3 min. Then, a solution of BrCH(Ph)COOCH<sub>3</sub> (0.69 g, 3 mmol) and THF (2 mL) was added at 0 °C over 3 min. After stirring for 15 min, the mixture was extracted with CH<sub>2</sub>Cl<sub>2</sub> and washed with water. The organic phase was dried over anhydrous Na<sub>2</sub>SO<sub>4</sub>, filtered, and evaporated under vacuum. The residue was subjected to column chromatography on silica eluting with ethyl acetate/hexane (1:10) to afford the product in 48% yield. <sup>1</sup>H NMR (CDCl<sub>3</sub>, δ, ppm): 3.77 (s, 3H, OCH<sub>3</sub>), 5.66 (s, 1H, CH), 7.00-7.70(m, 10H, C<sub>6</sub>H<sub>5</sub>); <sup>13</sup>C NMR (CDCl<sub>3</sub>, δ, ppm): 53.20, 55.52, 120.91, 121.91, 127.10, 128.75, 129.01, 129.79, 134.47, 156.34, 170.23, 217.98; LCMS (ESI) m/z: [M + Na]<sup>+</sup> calcd. for C<sub>16</sub>H<sub>14</sub>O<sub>3</sub>Se<sub>2</sub>, 436.93 (100%), 434.93 (90.3%), 432.93 (53.4%); found: 436.9171, 434.9177, 432.9182; HPLC: 98.6%.

**Procedures for Synthesis of Se-cyanomethyl S-ethyl carbonodiselenothioate (S1).** Ethanethiol (0.53 g, 3 mmol) was dissolved in THF (10 mL) and stirred with NaOH (0.12 g, 3 mmol) at 0 °C. A

solution of CSe<sub>2</sub> (0.53 g, 3 mmol) and THF (2 mL) was added at 0 °C over 3 min. Then, a solution of BrCH<sub>2</sub>CN (0.69 g, 3 mmol) and THF (2 mL) was added at 0 °C over 3 min. After stirring for 15 min, the mixture was extracted with CH<sub>2</sub>Cl<sub>2</sub> and washed with water. The organic phase was dried over anhydrous Na<sub>2</sub>SO<sub>4</sub>, filtered, and evaporated under vacuum. The residue was subjected to column chromatography on silica eluting with hexane to afford the product 55% yield. <sup>1</sup>H NMR (CDCl<sub>3</sub>, δ, ppm): 4.00 (s, 2H, CH<sub>2</sub>CN), 3.47 (m, 2H, CH<sub>2</sub>), 1.47 (t, 3H, CH<sub>3</sub>); <sup>13</sup>C NMR (CDCl<sub>3</sub>, δ, ppm): 9.86, 13.71, 34.64, 113.65, 213.59; LCMS (ESI) m/z: [M + Na]<sup>+</sup>calcd. for C<sub>5</sub>H<sub>7</sub>NSSe<sub>2</sub>, 295.86 (100%), 293.86 (81.2%), 291.86 (33.3%); found: 295.8553, 293.8562, 291.8567; HPLC: 98.1%.

## 10 Polymerization

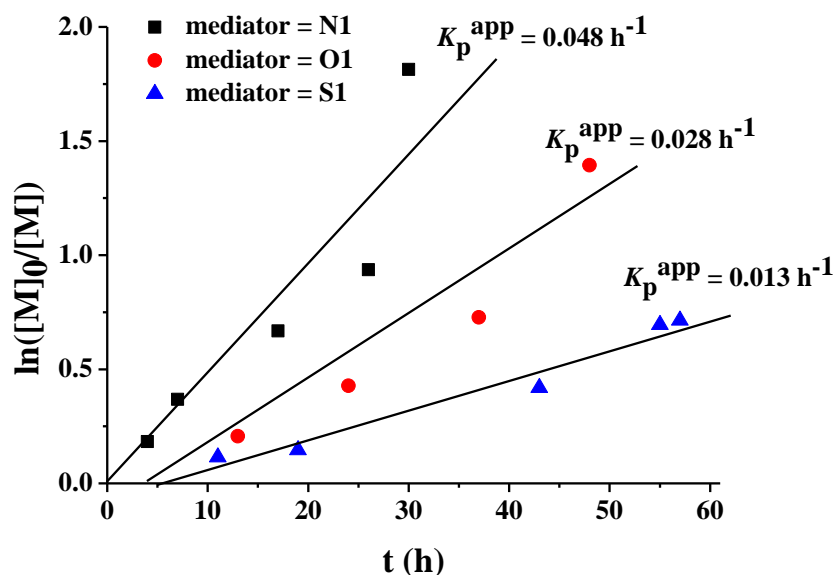

**FS 1.**  $\ln([M]_0/[M])$  as a function of time for the polymerization of styrene in the presence of N1, O1, and S1 with a molar ratio of  $[St]_0:[\text{seleno-mediator}]_0:[AIBN]_0=500:1:0.5$  in bulk at 60 °C.  $[St]_0 = 8.74$  mol/L,  $[\text{seleno-mediator}]_0 = 0.0175$  mol/L,  $[AIBN]_0 = 0.0087$  mol/L.

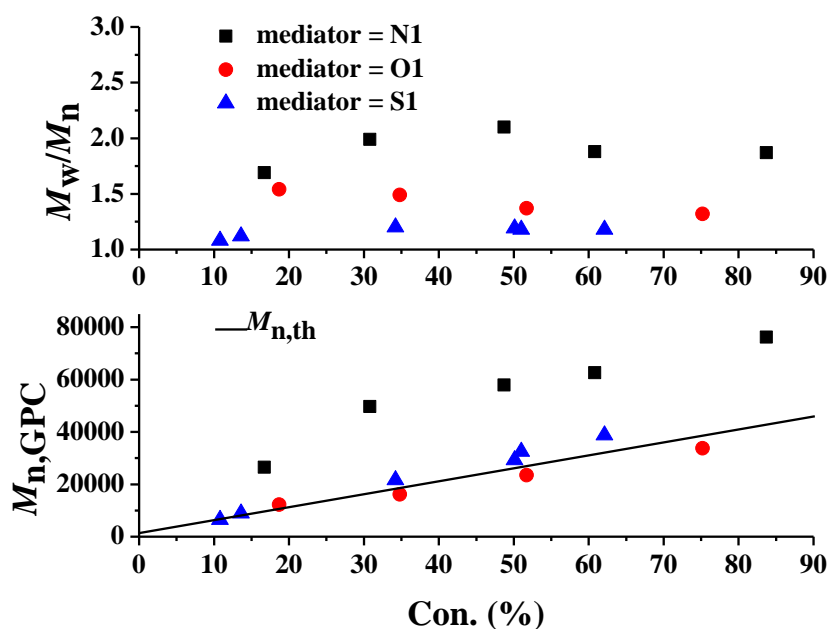

**FS 2.** Dependence of  $M_n$  and  $M_w / M_n$  on the conversion of styrene in the presence of N1, O1, and S1 with a molar ratio of  $[St]_0:[\text{seleno-mediator}]_0:[AIBN]_0=500:1:0.5$  in bulk at 60 °C.

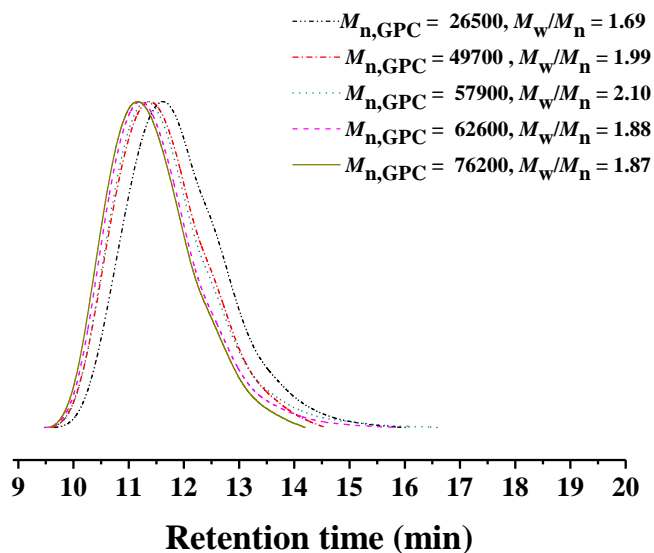

**FS 3.** Evolution of GPC traces of the prepared PS-N1 obtained from N1 mediated polymerization of styrene with a molar ratio of  $[St]_0:[N1]_0:[AIBN]_0 = 500:1:0.5$  under bulk condition at 60 °C.

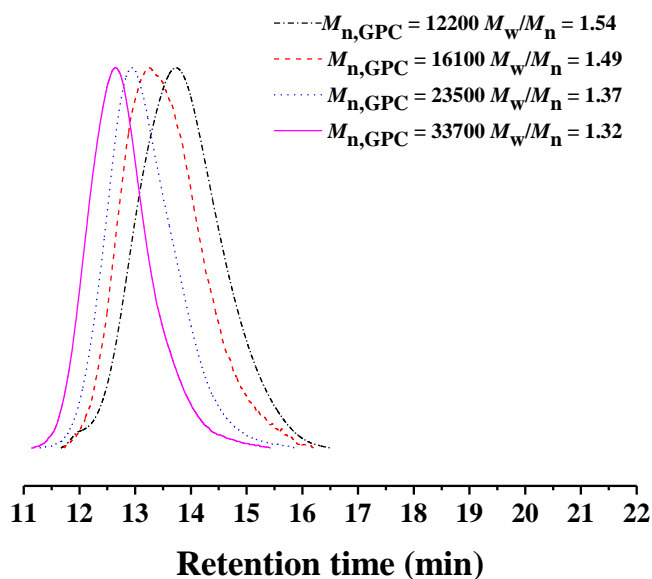

**FS 4.** Evolution of GPC traces of the prepared PS-O1 obtained from O1 mediated polymerization of styrene with a molar ratio of  $[St]_0:[O1]_0:[AIBN]_0 = 500:1:0.5$  under bulk condition at 60 °C.

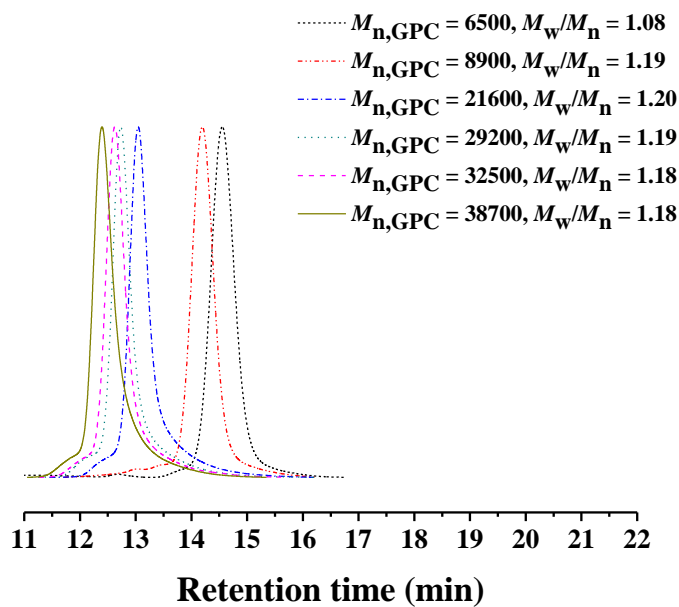

**FS 5.** Evolution of GPC traces of the prepared PS-S1 obtained from S1 mediated polymerization of styrene with a molar ratio of  $[St]_0:[S1]_0:[AIBN]_0 = 500:1:0.5$  under bulk condition at 60 °C.

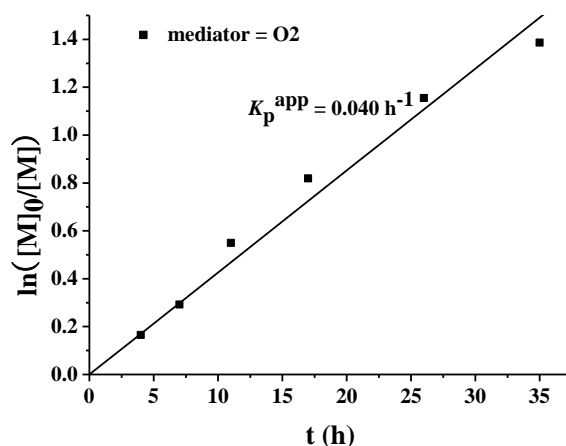

**FS 6.**  $\ln([M]_0/[M])$  versus time for the polymerization of styrene in the presence of O<sub>2</sub> with the molar ratio of [St]<sub>0</sub>: [O<sub>2</sub>]<sub>0</sub>: [AIBN]<sub>0</sub>=500:1:0.5 in bulk at 60 °C.

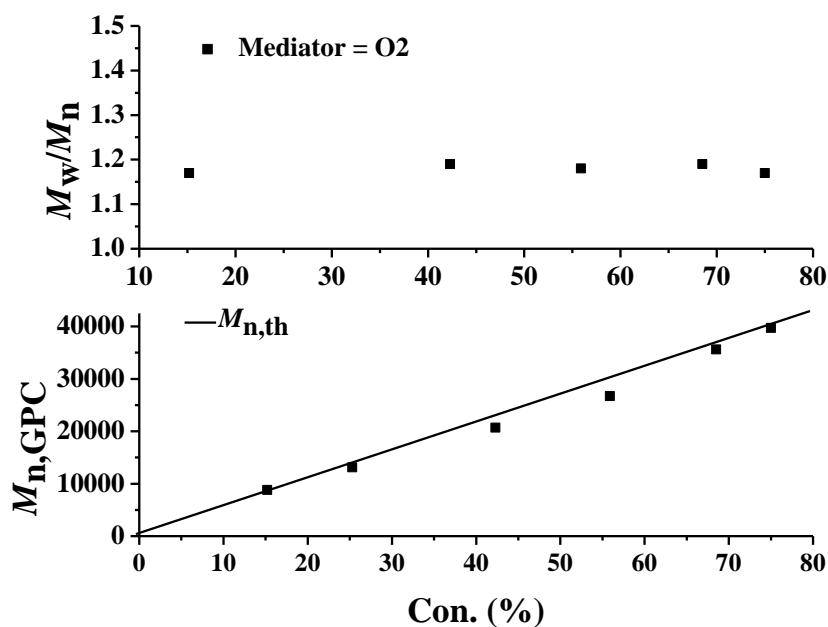

5

**FS 7.** Dependence of  $M_n$  and  $M_w / M_n$  on conversion of styrene in the presence of O<sub>2</sub> with the molar ratio of [St]<sub>0</sub>: [O<sub>2</sub>]<sub>0</sub>: [AIBN]<sub>0</sub>=500:1:0.5 in bulk at 60 °C. The number-average molecular weight ( $M_n$ ) and molecular weight distribution ( $M_w/M_n$ ) of the resulting polymers were determined using a Waters 1515 gel permeation chromatograph (GPC) equipped with a refractive-index detector (Waters 2414),  
10 using HR 1, HR 2 and HR 4 (7.8×300 mm, 5 μm beads size) columns with molecular weights ranging from 10<sup>2</sup> ~ 5×10<sup>5</sup> g/mol. THF was used as the eluent at a flow rate of 1.0 mL/min and 30 °C.

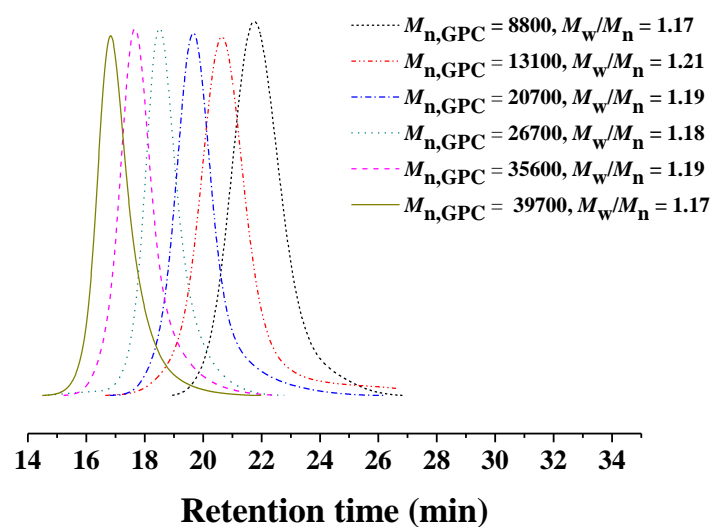

**FS 8.** Evolution of GPC traces of the prepared PS-O2 obtained from O2 mediated polymerization of styrene with the molar ratio of  $[St]_0:[O_2]_0:[AIBN]_0 = 500:1:0.5$  under bulk condition at 60°C.



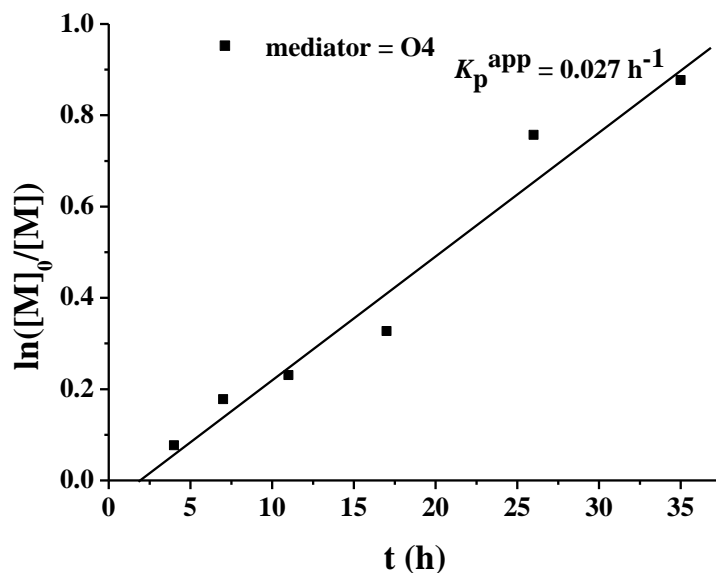

**FS 9.**  $\ln([M]_0/[M])$  as a function of time for the polymerization of styrene in the presence of O4 with a molar ratio of  $[St]_0:[O4]_0:[AIBN]_0=500:1:0.5$  in bulk at 60 °C.  $[St]_0 = 8.74$  mol/L,  $[O4]_0 = 0.0175$  mol/L,  $[AIBN]_0 = 0.0087$  mol/L.

5

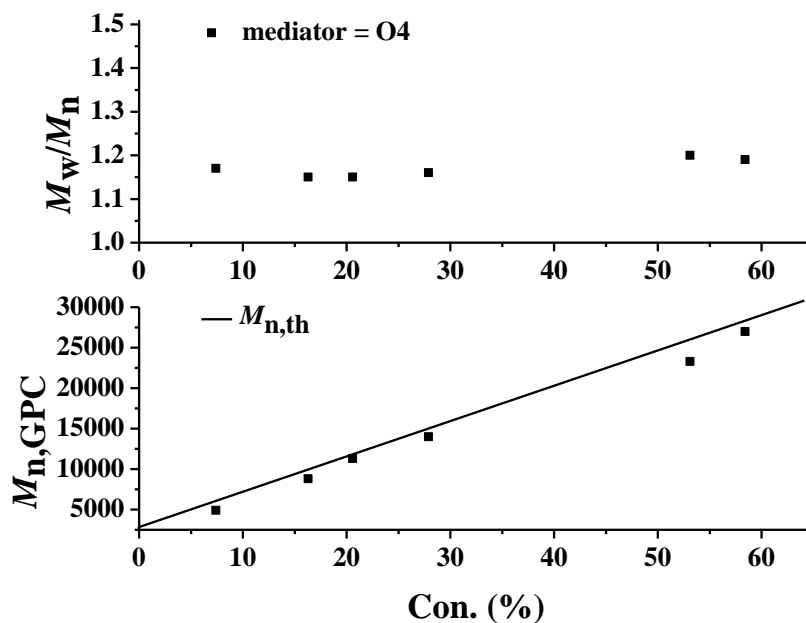

**FS 10.** Dependence of  $M_n$  and  $M_w / M_n$  on the conversion of styrene in the presence of O4 with a molar ratio of  $[St]_0:[\text{seleno-mediator}]_0:[AIBN]_0=500:1:0.5$  in bulk at 60 °C.

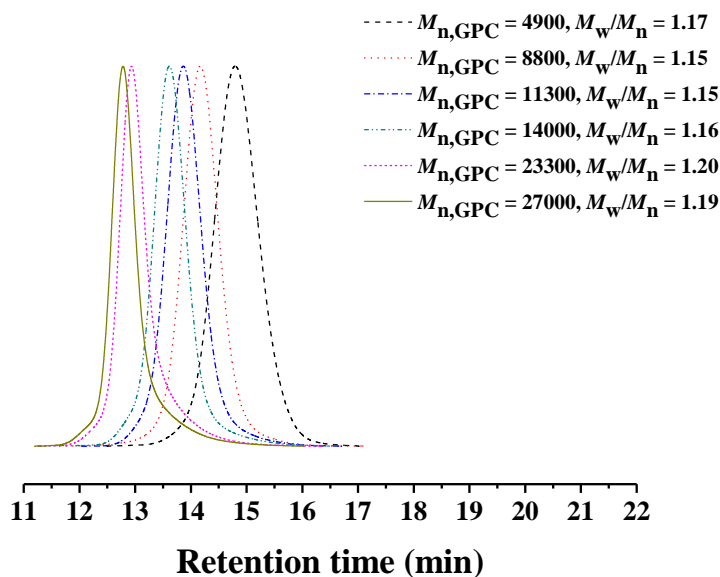

**FS 11.** Evolution of GPC traces of the prepared PS-O4 obtained from O4 mediated polymerization of St with a molar ratio of  $[St]_0:[O4]_0:[AIBN]_0 = 500:1:0.5$  under bulk condition at 60 °C.

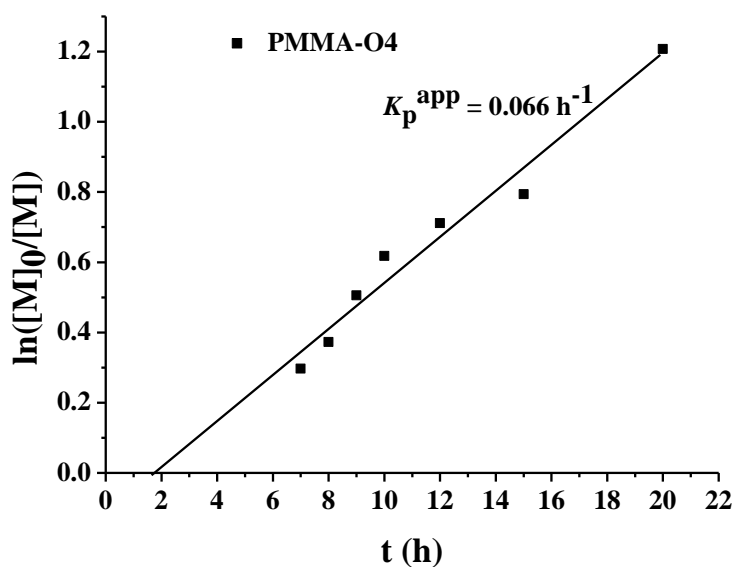

**FS 12.**  $\ln([M]_0/[M])$  as a function of time for the polymerization of MMA in the presence of O4 with a molar ratio of  $[MMA]_0:[O4]_0:[AIBN]_0 = 500:1:0.5$  in bulk at 60 °C.  $[MMA]_0 = 9.47 \text{ mol/L}$ ,  $[O4]_0 = 0.0189 \text{ mol/L}$ ,  $[AIBN]_0 = 0.0095 \text{ mol/L}$ .

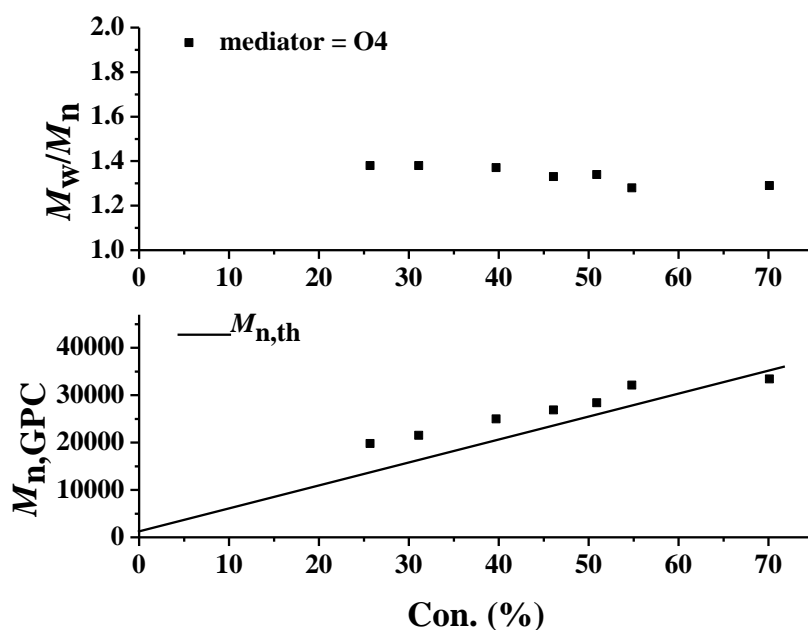

**FS 13.** Dependence of  $M_n$  and  $M_w / M_n$  on the conversion of MMA in the presence of O4 with a molar ratio of  $[MMA]_0:[O4]_0:[AIBN]_0=500:1:0.5$  in bulk at 60 °C.

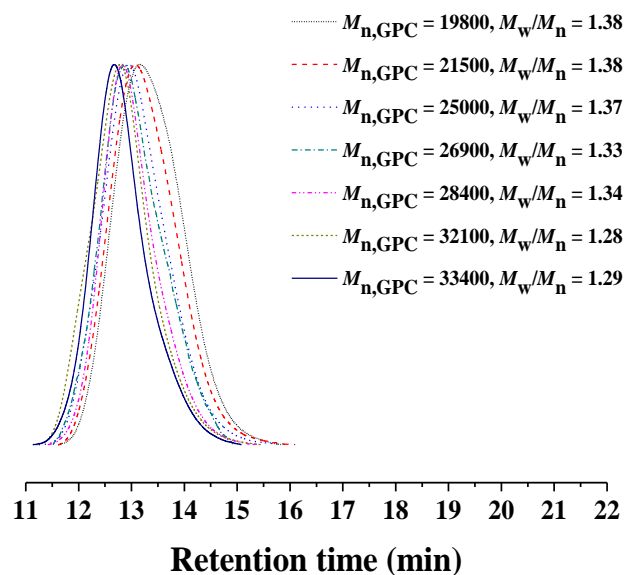

5

**FS 14.** Evolution of GPC traces of the prepared PMMA-O4 obtained from O4 mediated polymerization of MMA with a molar ratio of  $[MMA]_0:[O4]_0:[AIBN]_0 = 500:1:0.5$  under bulk condition at 60 °C.

It showed that, in the presence of N1, the molecular weights were higher than theoretical one and the molecular weight distributions were broad (FS 2 and FS 3), which is similar to its thiocarbonylthio analogues (i.e., diethylcarbamodithioates).<sup>[2]</sup> In case of O1, the molecular weights of the prepared polystyrene (PS) determined by GPC were close to the theoretical values with relatively narrow molecular weight distributions in the range of 1.32-1.54 (FS 2 and FS 4). Compared with its thiocarbonylthio analogues (i.e., O-ethyl carbonodithioates), which was classical RAFT agents for polymerization of vinyl acetate, was rarely applied in the polymerization of St.<sup>[3]</sup> In case of S1, the molecular weights of the obtained PS determined by GPC were close to the theoretical values with narrow molecular weight distributions in the range of 1.08-1.19 (FS 2 and FS 5), and the thiocarbonylthio analogues (i.e., alkyl carbonotrithioates) were also good RAFT agents for polymerization of St and other conjugated monomers.<sup>[4]</sup> The results shown in FS 8, FS 10, and FS 11 indicated that O2 and O4 controlled the polymerization of styrene by the linear increase in the number-average molecular weight as a function of the monomer conversion, the agreement between the experimental molecular weights, and the predicted values and the narrow molecular weight distributions that were in the range of 1.17-1.21 and 1.15-1.20. In addition, the thiocarbonylthio analogues (i.e., O-phenyl carbonodithioates) were not good RAFT agents for polymerization of St.<sup>[2]</sup> In the presence of O4, the molecular weights of the obtained PMMA determined by GPC were close to the theoretical values with narrow molecular weight distributions in the range of 1.28-1.38 (FS 13 and FS14).

## Reference

- [1] a) Pan, X.; Zhu, J.; Zou, J.; Zhang, Z.; Cheng, Z.; Zhou, N.; Zhang, W.; Zhu, X. *Org. Lett.* **2013**, *14*, 6170. b) Murai, T.; Mizutani, T.; Kanda, T. and Kato, S. *J. Am. Chem. Soc.* **1993**, *115*,

5823. c) Tani, K.; Murai, T. and Kato, S. *J. Am. Chem. Soc.* **2002**, *124*, 5960. d) Murai, T.; Ogino, Y. Mizutani, T.; Kanda, T. and Kato, S. *J. Org. Chem.* **1995**, *60*, 2942.
- [2] Chiefari, J.; Mayadunne, R. T. A.; Moad, C. L.; Moad, G.; Rizzardo, E.; Postma, A.; Skidmore, M. A.; Thang, S. H. *Macromolecules* **2003**, *36*, 2273.
- <sup>s</sup> [3] Altarawneh, I. S. ; Gomes, V. G. and Srouf, M. S. *Macromol. React. Eng.* **2008**, *2*, 58.
- [4] a) Magenau, A. J. D.; Martinez-Castro, N. and Storey, R. F. *Macromolecules* **2009**, *42*, 2353. b) Ran, R.; Chen, Z. and Wang, X.-L. *Journal of Applied Polymer Science* **2009**, *111*, 2011. c) Guerrero-Sanchez, C.; Keddie, D. J.; Saubern, S. and Chiefari, J. *ACS Comb. Sci.* **2012**, *14*, 389.
